# Supplementary material for: Bipolaron hopping conduction in vacancy-ordered Cs2PtI6 perovskites
Source: Royal Society of Chemistry journal article supplement (doi:10.1039/d5dt00726g), 2025-01-01
Supplement: d5dt00726g1.pdf [file d5dt00726g1.pdf]

## **Bipolaron Hopping Conduction in Vacancy-Ordered Cs<sub>2</sub>PtI<sub>6</sub> Perovskites**

Vidya Raj,<sup>ab</sup> Abhishek Anand,<sup>ab</sup> Manasa Manoj,<sup>ab</sup> and Aravind Kumar Chandiran<sup>ab\*</sup>

<sup>a</sup>Department of Chemical Engineering, Indian Institute of Technology Madras, Adyar, Chennai, Tamil Nadu, India 600036.

<sup>b</sup>Hyundai HTWO Innovation Centre, Indian Institute of Technology Madras, Adyar, Chennai, Tamil Nadu, India 600036.

\* aravindkumar@iitm.ac.in

### **Electronic Supplementary Information**

## Experimental Section

### Material Synthesis:

Cesium iodide (CsI, Spectrochem, 99.5%) and chloroplatinic acid hexahydrate ( $\text{H}_2\text{PtCl}_6 \cdot 6\text{H}_2\text{O}$ , Sigma Aldrich, >37% Pt basis) were mixed in a 2:1 molar ratio and added to a Teflon reactor. Hydroiodic acid (HI, Qualigens) was then added to the mixture. The reactor was sealed and subjected to hydrothermal treatment at 170 °C for 6 hours. The resulting  $\text{Cs}_2\text{PtI}_6$  powder was washed with ethanol three times and dried in a hot air oven at 70 °C for 12 hours.

### Pellet Formation:

200 mg of  $\text{Cs}_2\text{PtI}_6$  powder was pressed into a pellet using a die set and a hydraulic press (PCI Analytics) at a pressure of 2 tons.

### Characterization:

The powder X-ray diffraction pattern was recorded using a Thermo Scientific Equinox 3000 with a Cu  $\text{K}\alpha$  radiation source. High-resolution micrographs were obtained using a Hitachi S-4800 scanning electron microscope. Fourier Transform Infrared Spectroscopy (FTIR) measurements were taken in the range of 4000-50  $\text{cm}^{-1}$  using a JASCO 6600FV spectrometer with an ATR attachment. The spectrometer was operated under a complete vacuum for far-infrared measurements. The absorption onset of the sample was measured using a Shimadzu UV-2600 UV-Vis-NIR spectrophotometer equipped with a barium sulfate coated integrating sphere. Thermal decomposition of the samples was studied using a SDT Q600 (T.A. Instruments) with a temperature range from 25 °C to 900 °C at a rate of 10 °C/min under nitrogen. Phase transitions were analyzed using a NETZSCH DSC 204 F1 Phoenix differential scanning calorimeter. X-ray Photoelectron Spectroscopy (XPS) measurements were performed using an AXIS SUPRA instrument equipped with an Al  $\text{K}\alpha$  source at 1486.69 eV photon energy. The XPS data were analyzed using CASA XPS software, and all spectra were calibrated to the C 1s peak at 284.6 eV. Temperature dependent Raman spectra were acquired using a Horiba-Yvon (HR-800UV) Raman spectrometer with a 632.4 nm laser excitation source. Temperature-dependent measurements on pellets were performed using the same device in conjunction with a temperature-controlled Linkam Stage (THMS600).

### Temperature-dependent Electrochemical Impedance Spectroscopy

Temperature-dependent dielectric measurements were conducted on pellets inside a liquid  $\text{N}_2$ -cooled Janis Cryostat over a temperature range of 420K to 100K. Dielectric data was acquired using a Solartron 1296 Dielectric Interface System within a frequency range of 1 MHz to 10 mHz, at an AC applied bias of 100 mV. The sample temperature was maintained with a Lakeshore temperature controller.

### Discussion on characterization of Cs<sub>2</sub>PtI<sub>6</sub>:

The identity of Cs<sub>2</sub>PtI<sub>6</sub> was confirmed by comparing the X-ray diffraction pattern with literature data (**Figure S5(a)**). The particle size, visualized using SEM, was found to range between 3-5  $\mu\text{m}$  on average (**Figure S5(b)**). The IR-active stretching and bending modes of the material were measured using Fourier Transform Far-Infrared Spectroscopy (FTIR), revealing two peaks at 180  $\text{cm}^{-1}$  and 89.8  $\text{cm}^{-1}$ , corresponding to Pt-I asymmetric stretching and I-Pt-I asymmetric bending, respectively (**Figure S5(c)**).

For opto-electronic applications, the absorption onset or bandgap is crucial. The material's absorption onset was observed at 954 nm (**Figure S6(a)**), and the bandgap was determined to be 1.3 eV, calculated from a Tauc plot (**Figure S6(b)**). To investigate phase changes within the stable temperature range, differential scanning calorimetry (DSC) was performed. No phase changes were observed between 180 K and 300 K, as shown in **Figure S7(a)**. The thermogravimetric analysis (TGA) shows that Cs<sub>2</sub>PtI<sub>6</sub> remained stable up to approximately 623 K. The material experienced a 60% weight loss, corresponding to the release of two molecules of I<sub>2</sub>, leaving behind a residue of Pt and CsI (**Figure S7(b)**).

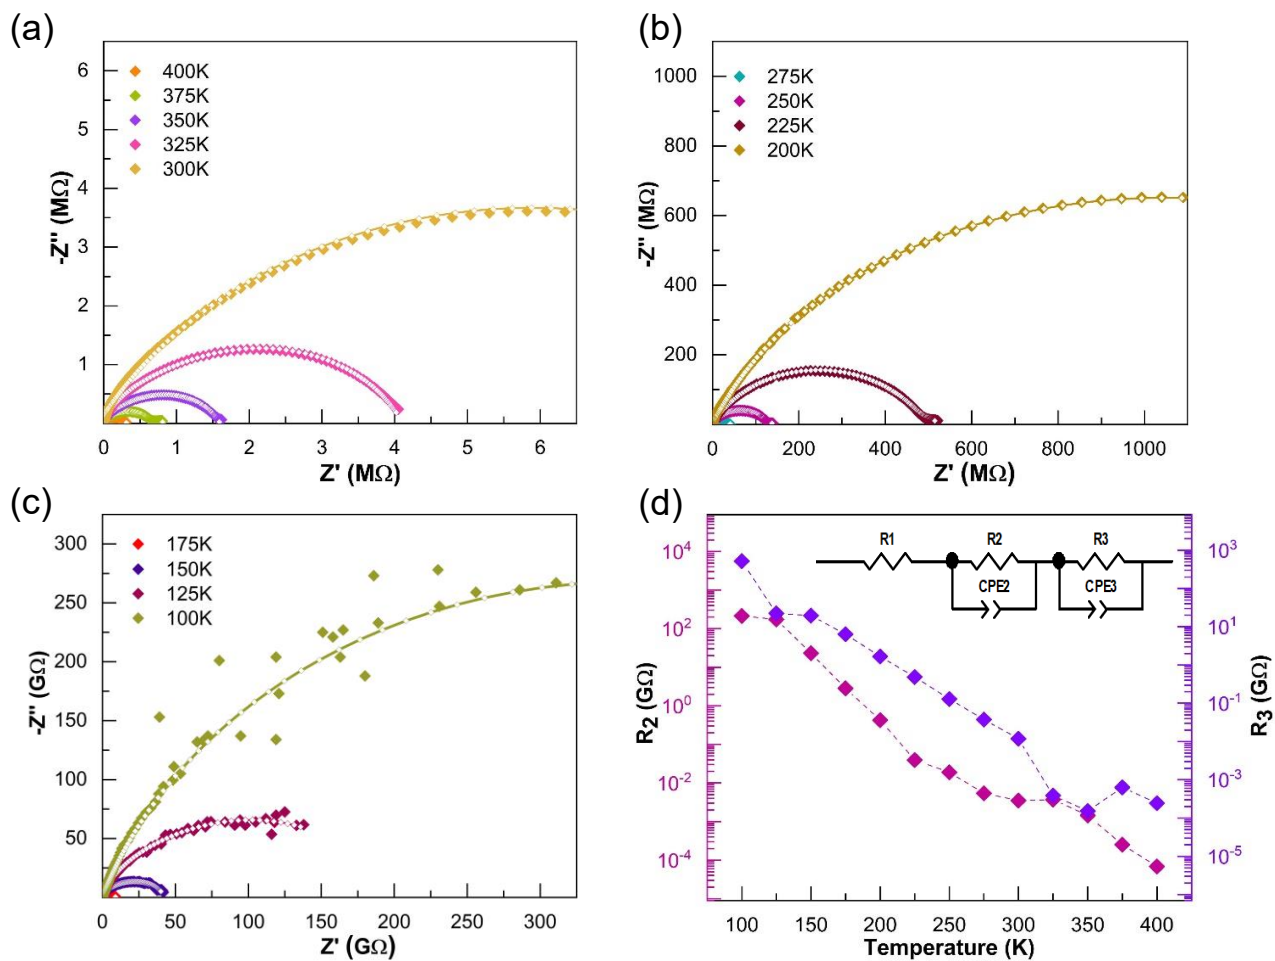

**Figure S1.** Raw and fit data of the Nyquist plots in the temperature range (a)  $400\text{ K} \leq T \leq 300\text{ K}$ , (b)  $275\text{ K} \leq T \leq 200\text{ K}$ , (c)  $175\text{ K} \leq T \leq 100\text{ K}$ , and (d) temperature-dependence of the charge transport resistances  $R_2$  and  $R_3$  as a function of temperature. The inset shows the equivalent circuit used for fitting the Nyquist plots.

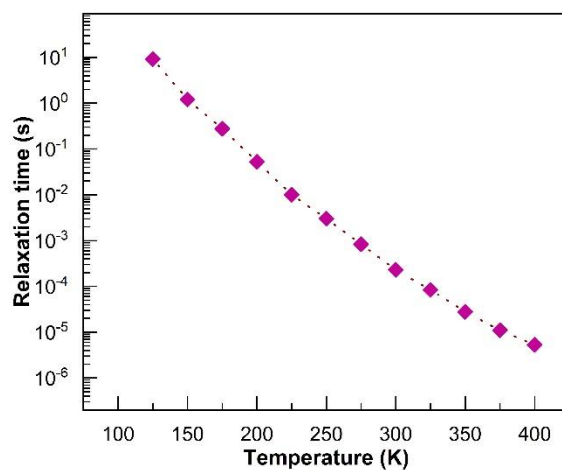

**Figure S2.** The variation of relaxation time as a function of temperature.

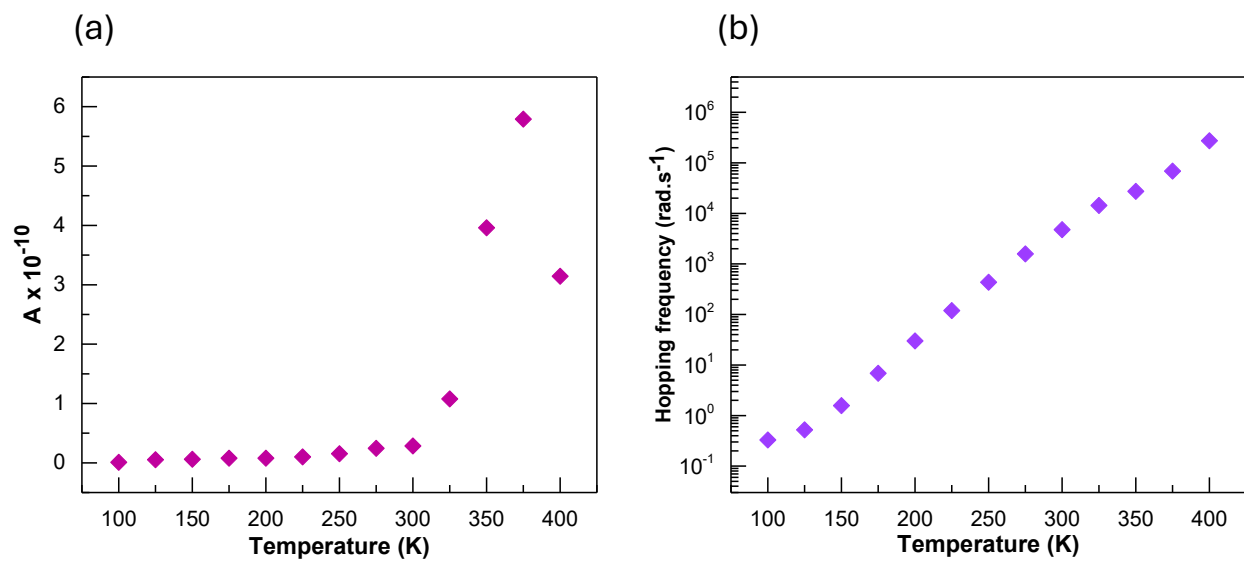

**Figure S3.** (a) The variation of constant A as a function of temperature and (b) change in hopping frequency with temperature rise.

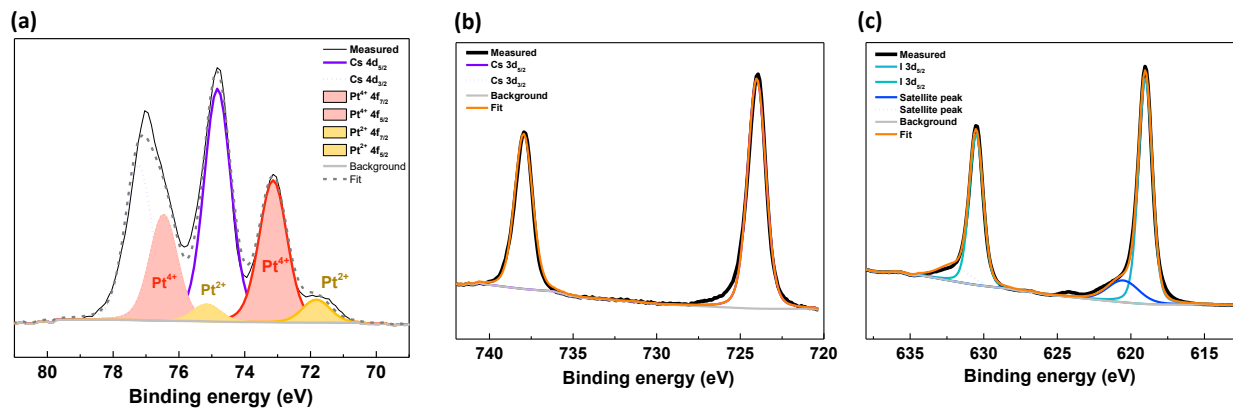

**Figure S4.** Deconvoluted and fitted X-ray photoemission spectra. (a) Pt 4f transition (+ Cs 4d transition, (b) Cs 3d transition and (c) I 3d transition.

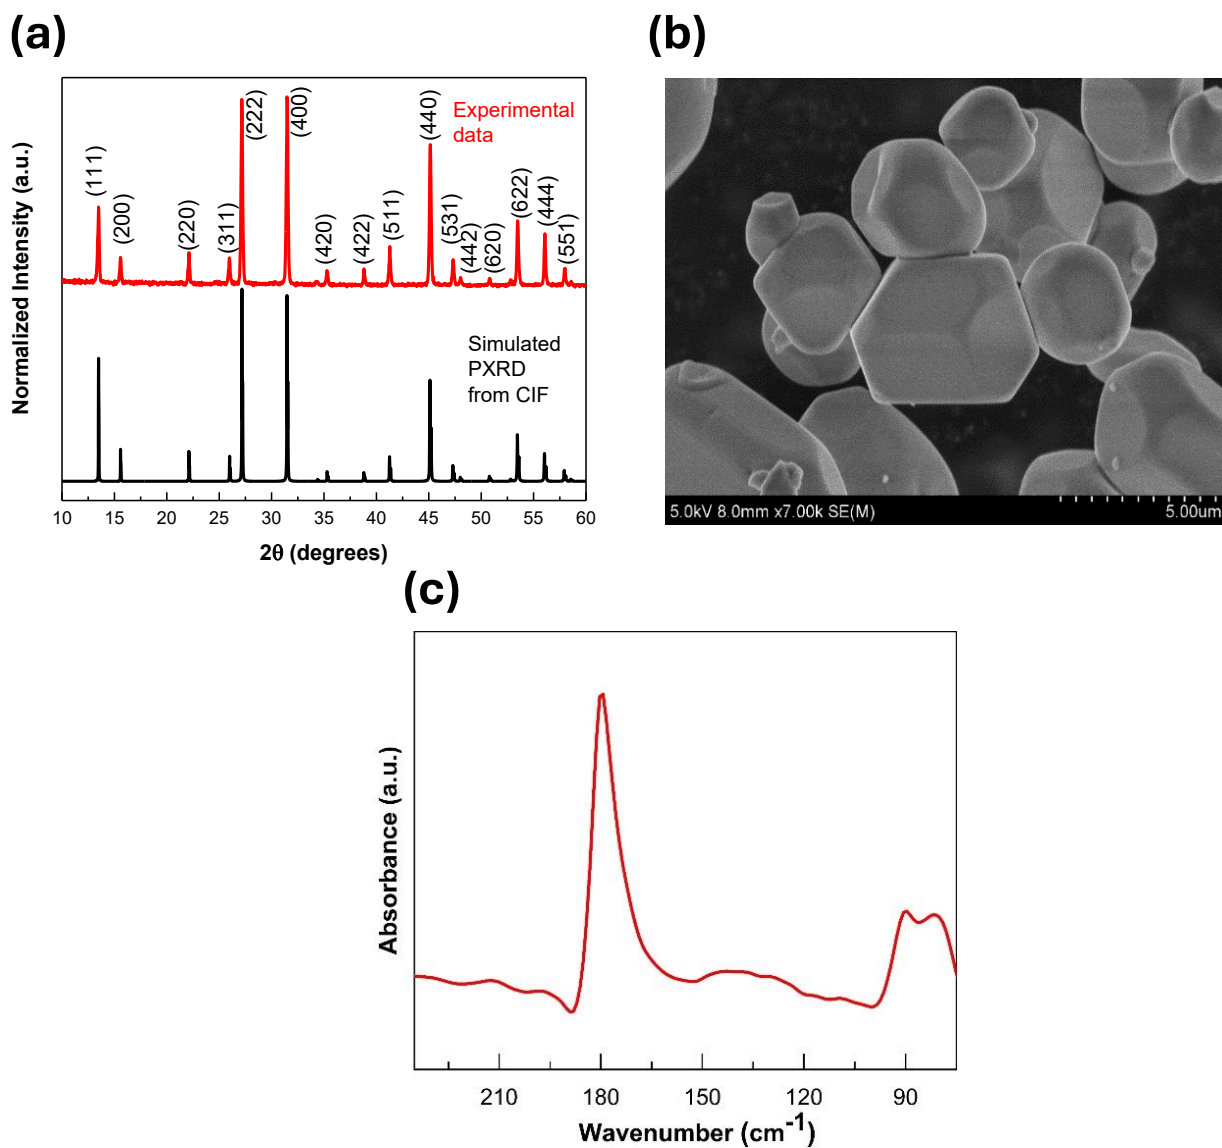

**Figure S5.** (a) X-ray diffraction (XRD) pattern of synthesized material and its data is compared with simulated XRD from CIF file in reference [1], (b) SEM micrographs, and (c) FTIR data of  $\text{Cs}_2\text{PtI}_6$ .

- 1 P. Villars and K. Cenzual, Eds., *Springer-Verlag Berlin Heidelberg & Material Phases Data System (MPDS)*, Switzerland & National Institute for Materials Science (NIMS), Japan, preprint, [https://materials.springer.com/isp/crystallographic/docs/sd\\_1004269](https://materials.springer.com/isp/crystallographic/docs/sd_1004269).

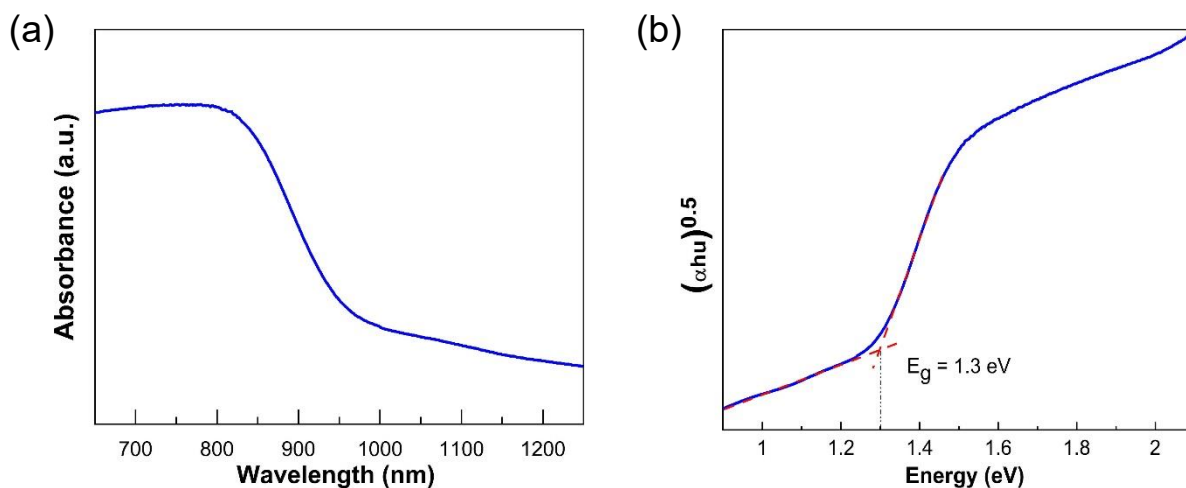

**Figure S6.** (a) Absorbance spectra of  $\text{Cs}_2\text{PtI}_6$ . (b) Bandgap extracted from Tauc plot.

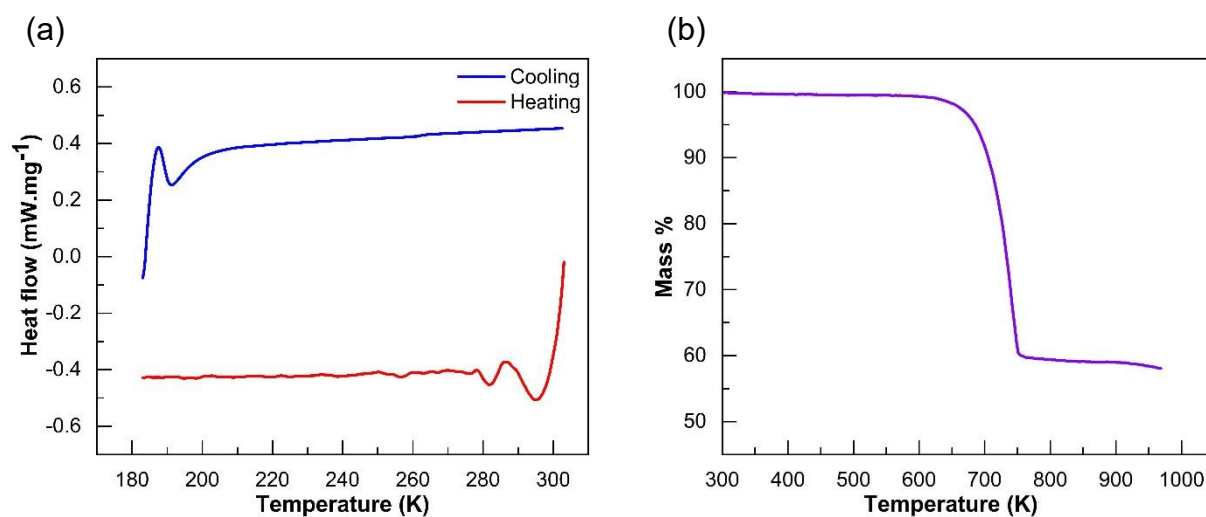

**Figure S7.** (a) Heat flow in  $\text{Cs}_2\text{PtI}_6$  obtained during heating and cooling cycles in Differential Scanning Calorimetry measurements and (b) mass loss studied by thermogravimetric analysis of  $\text{Cs}_2\text{PtI}_6$ .
